# Supplementary material
Source: PubMed Central journal article supplement (PMC8206034)
Supplement: NIHMS1705315-supplement-1.pdf [file NIHMS1705315-supplement-1.pdf]

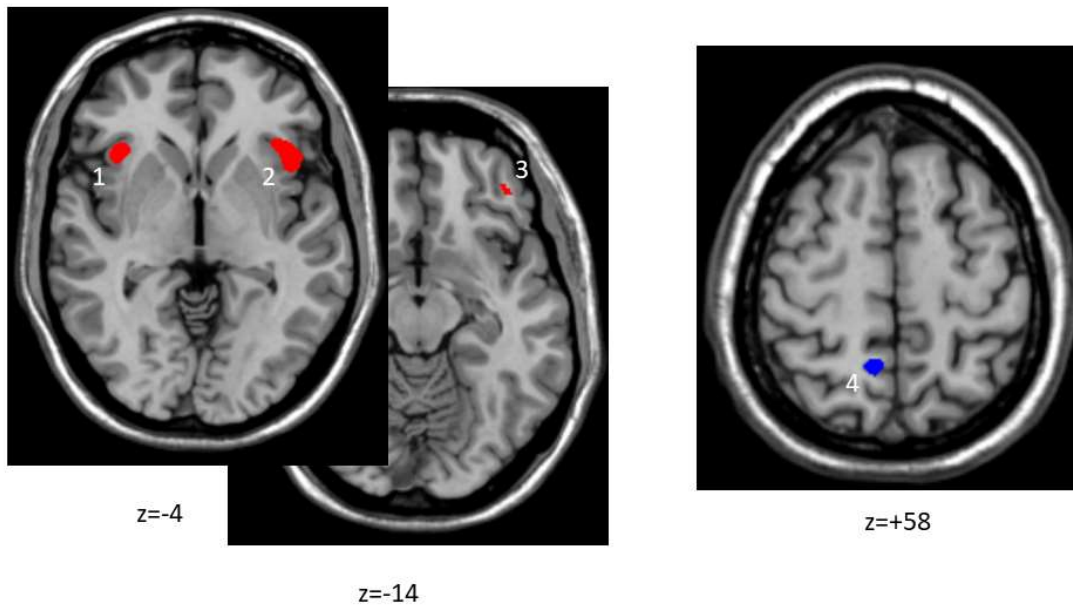

**Supplementary figure 1:** Activations during the AST based on analysis of the shock-safe condition in which peak-level p value was  $<0.001$ . None of these activations survived FWE. Left image 1) R anterior insula (38 voxels), 2) L anterior Insula (81 voxels) and 3) Pars orbitalis, inferior frontal cortex (6 voxels) showed reduced activation (red) in SSD compared with CC; 4) R precuneus (4 voxels) showed increased activation (blue) in SSD compared with CC.
